# Supplementary material
Source: publisher figshare collection journal article supplement (https://acs.figshare.com/ndownloader/files/15314966)
Supplement: Supplementary file 1 [file 15314966]

**DNA-templated strontium-doped calcium phosphate nanoparticles  
for gene delivery in bone cells**

Razieh Khalifehzadeh <sup>a,b</sup>, Hamed Arami <sup>b, c, \*</sup>

<sup>a</sup> Department of Chemical Engineering, Stanford University, Shriram Center, 443  
Via Ortega, Stanford, California 94305, United States

<sup>b</sup> Department of Radiology, Stanford University School of Medicine, James H.  
Clark Center, 318 Campus Drive, E-153, Stanford, California 94305, United  
States

<sup>c</sup> Molecular Imaging Program at Stanford (MIPS), Stanford University School of  
Medicine, James H. Clark Center, 318 Campus Drive, E-153, Stanford, California  
94305, United States

\*Corresponding author.

E-mail address: arami1@stanford.edu

## Supporting Information:

Figure S1 to S2.

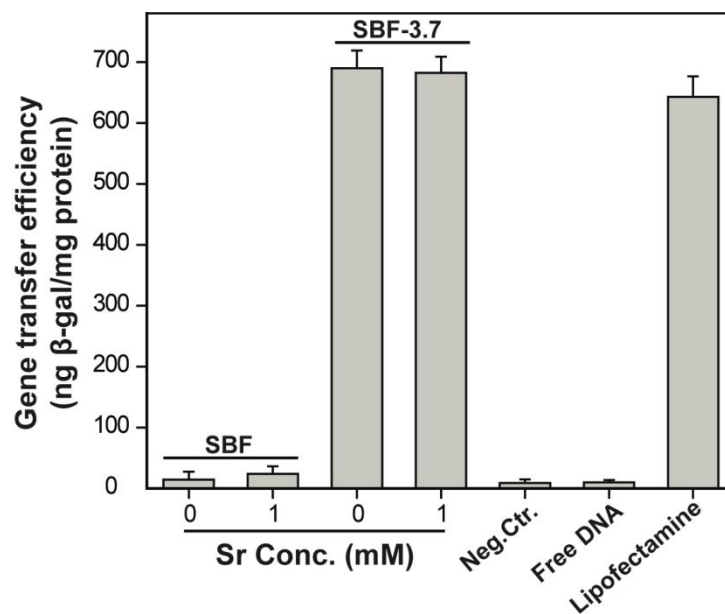

**Figure S1.** The gene transfer efficiency using SrCaP-DNA NPs prepared by two different mineralizing solutions (SBF and SBF-3.7). The gene transfer efficiency is shown as the amount of reporter gene encoding  $\beta$ -galactosidase ( $\beta$ -gal) normalized by total protein.

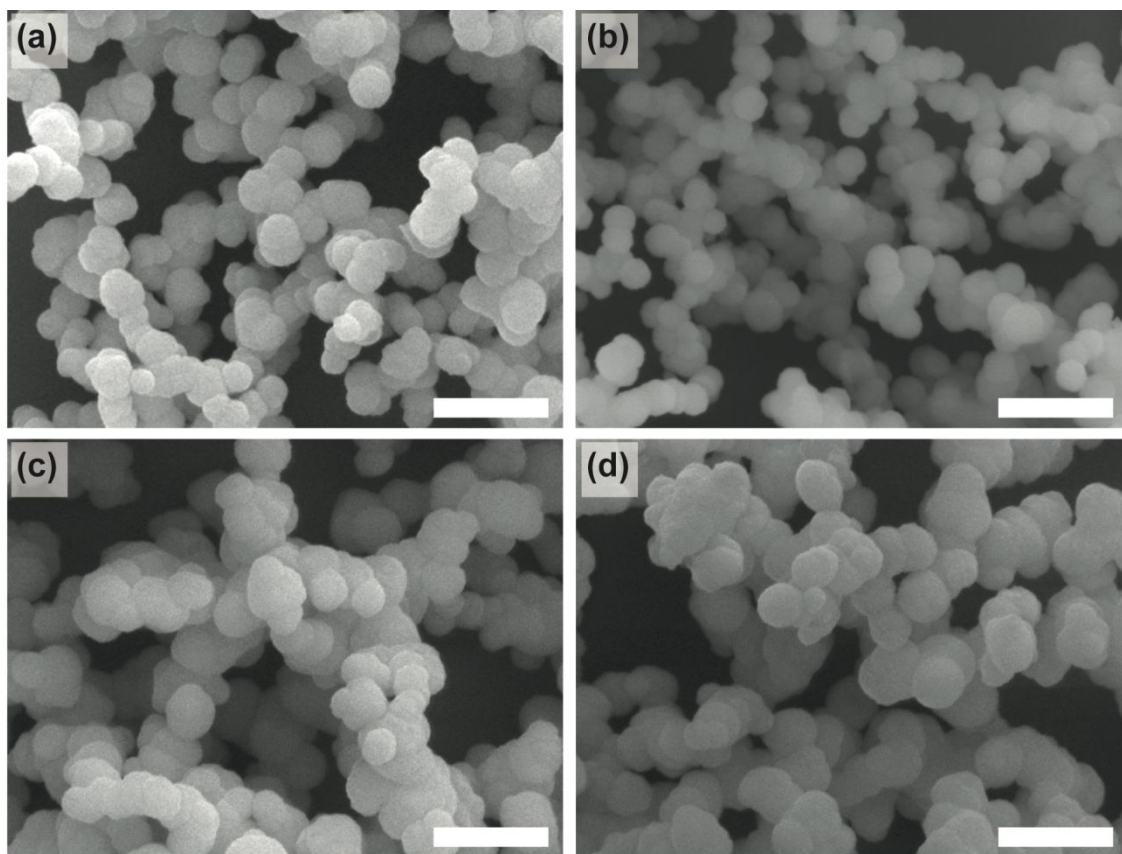

**Figure S2.** SEM micrographs of SrCaP-DNA NPs synthesized using mineralizing solution SBF-3.7 with higher concentrations of  $\text{Sr}^{2+}$ . (a) 6 mM, (b) 12 mM, (c) 18 mM and (d) 24 mM. Scale bar is 1  $\mu\text{m}$ .
